# Supplementary material for: Validation of a Culturally Relevant Snakebite Envenomation Clinical Practice Guideline in Brazil
Source: MDPI journal article supplement (doi:10.3390/toxins14060376), 2022-05-28
Supplement: s1 [file s1]

*Supplementary material*

**Table S1.** Semi-structured interview guide used in the focal group for care practice guideline validation by target users.

| Questions                                                                                                          | Areas expected to be covered during the discussion                                                                                                                                                                                                                                  |
|--------------------------------------------------------------------------------------------------------------------|-------------------------------------------------------------------------------------------------------------------------------------------------------------------------------------------------------------------------------------------------------------------------------------|
| 1. Who here has treated someone that has been bitten by a snake?<br>Can you tell us about your experience?         | a) Place of treatment (at the hospital or elsewhere)<br>b) Severity of the cases<br>c) Complications/outcomes<br>d) Use of antivenom<br>e) Traditional remedies and self-care procedures observed<br>f) Where the knowledge that was used in the treatment of these cases came from |
| 2. What subjects most interest you in this training course?                                                        | a) Specific topics/classes<br>b) Added knowledge<br>c) Conduct in practice<br>d) Subjects that are more difficult to understand                                                                                                                                                     |
| 3. How can this care practice guideline (CPG) contribute to the medical assistance you will provide in the future? | a) Feel more prepared/confident<br>b) Possibility of applying the CPG in the municipality where I work                                                                                                                                                                              |
| 4. What suggestions would you give for improving the CPG?                                                          | a) Contents to be added, deleted or improved<br>b) Need for structure and presentation improvements                                                                                                                                                                                 |
