# Supplementary material for: Validation of a Culturally Relevant Snakebite Envenomation Clinical Practice Guideline in Brazil
Source: Toxins (Basel). 2022 May 28;14(6):376. doi: 10.3390/toxins14060376 (PMC9229773; doi:10.3390/toxins14060376)
Supplement: Supplementary file 1 [file toxins-14-00376-s001.zip]

Archive with 4 entries (4 files):
- File S1.pdf
- File S2.pdf
- Table S1.pdf
- Table S2.pdf
